# Supplementary material for: Level of Fatty Acid Binding Protein 5 (FABP5) Is Increased in Sputum of Allergic Asthmatics and Links to Airway Remodeling and Inflammation
Source: PubMed Central journal article supplement (PMC4447257; doi:10.1371/journal.pone.0127003), 2015-05-28
Supplement: pone.0127003.s001.pdf [file pone.0127003.s001.pdf]

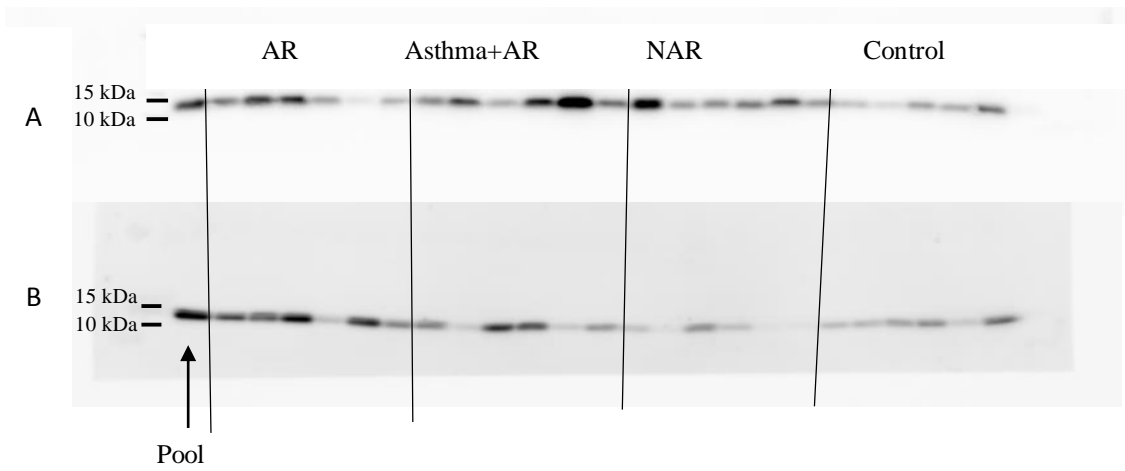

**S1 Fig. Western blot image of FABP5 validation from 23 sputum (A) and 24 NLF samples (B).** Starting from the left, a molecular weight marker (Precision Plus Protein, Dual color, Bio-Rad Laboratories) followed by the pooled sample and five to six patient samples per each group are represented as an example.
