# Supplementary material for: Level of Fatty Acid Binding Protein 5 (FABP5) Is Increased in Sputum of Allergic Asthmatics and Links to Airway Remodeling and Inflammation
Source: PubMed Central journal article supplement (PMC4447257; doi:10.1371/journal.pone.0127003), 2015-05-28
Supplement: pone.0127003.s002.pdf [file pone.0127003.s002.pdf]

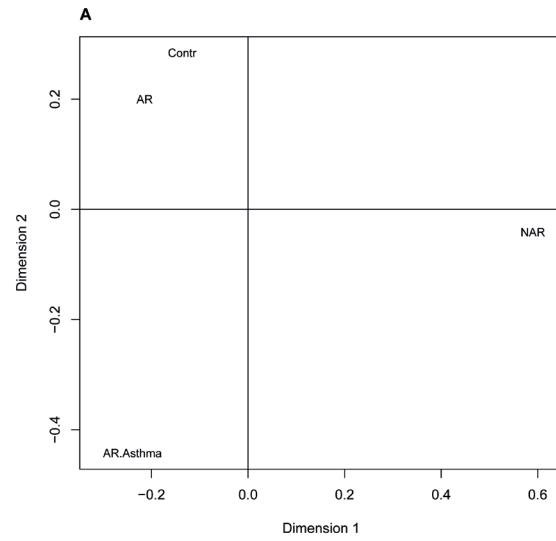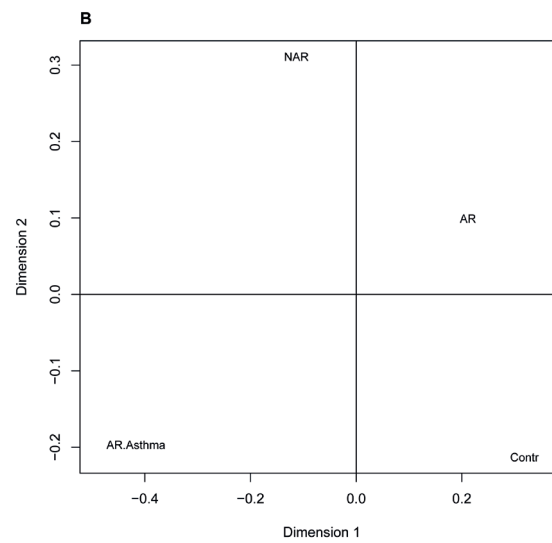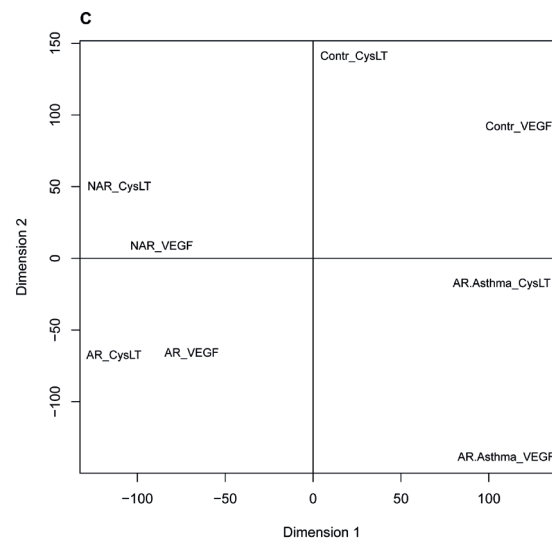

**S2 Fig. Principal component analysis with the validation results for FABP5, CysLT and VEGF.** Euclidean distances were compared between the study groups. FABP5 in IS (A), FABP5 in NLF (B), CysLT and VEGF in NLF (C). AR= allergic rhinitis, Asthma.AR= asthma and allergic rhinitis, NAR= nonallergic rhinitis, Contr= healthy controls.
